# Supplementary material for: Selected region functionalized fungi with magnetic targeting properties and versatile purification capabilities
Source: Royal Society of Chemistry journal article supplement (doi:10.1039/c2nr30766a), 2012-01-01
Supplement: c2nr30766a.pdf [file c2nr30766a.pdf]

## Supporting Information

### Selected Region Functionalized Fungi with Magnetic Targeting Properties and Versatile Purification Capabilities

By Xiaolei Wang, Hui Zhu, Jia Zhang, Xuexia Liu, Fan Yang and Xiurong Yang \*

*1 State Key Laboratory of Electroanalytical Chemistry, Changchun Institute of Applied Chemistry, Chinese Academy of Sciences, 5625 Renmin Street, Changchun, Jilin, 130022, China*

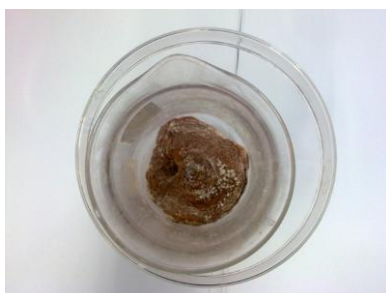

**Figure S1** The beginning of this investigation: a rotten apple

The entire investigation on selected region functionalized fungi was started at the beginning of 2011 with some unexpected issues. One spring morning, my wife gave me an apple before I went to the laboratory. Unfortunately, I forgot and left it in a drawer for about 3 weeks. After I found the rotten apple, I felt so sorry and decided to do something with this apple. So I examine the surface of the apple by scanning electron microscopy. The net-like morphology of the rotting fungi reminded me of a series of investigations reported by Dr R. Gopal, Dr V. Thavasi and Professor Seeram Ramakrishna (J. Membr. Sci., 2006, 281, 581–586; Energy Environ. Sci., 2008, 1, 205–221). They explored the removal of micron sized particles by using artificial membranes with similar net-like morphology. These interesting experience inspired me to consider the potential applications of this natural microorganisms in pollution treatment .

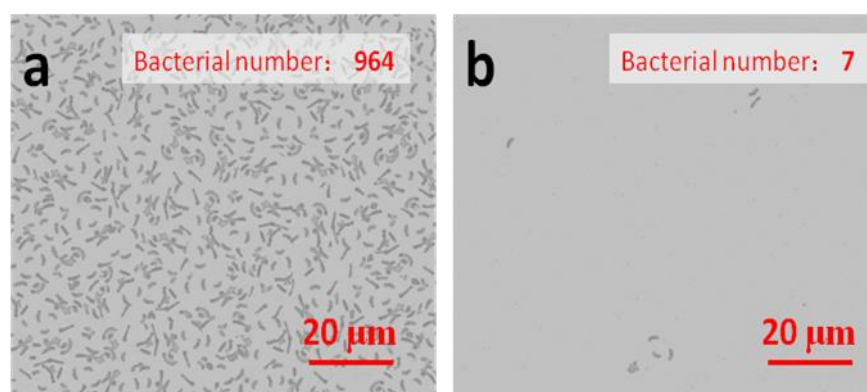

**Figure S2** The bacterial number of *Helicobacter pylori* before (a) and after (b) cleaned by AFF.

| Bacterial strain      | Bacterial number<br>before treatment | Bacterial number<br>after treatment | Clearance rate |
|-----------------------|--------------------------------------|-------------------------------------|----------------|
| <i>H. pylori</i> No.1 | 964                                  | 7                                   | 99.3%          |
| <i>H. pylori</i> No.2 | 772                                  | 59                                  | 92.3%          |
| <i>H. pylori</i> No.3 | 563                                  | 1                                   | 99.8%          |
| <i>H. pylori</i> No.4 | 1233                                 | 62                                  | 95.0%          |
| <i>H. pylori</i> No.5 | 621                                  | 24                                  | 96.1%          |
| <i>E.coli</i> No.1    | 823                                  | 15                                  | 98.2%          |
| <i>E.coli</i> No.2    | 996                                  | 21                                  | 97.9%          |
| <i>E.coli</i> No.3    | 787                                  | 13                                  | 98.3%          |
| <i>E.coli</i> No.4    | 815                                  | 37                                  | 95.5%          |
| <i>S. aureus</i> No.1 | 677                                  | 31                                  | 95.4%          |
| <i>S. aureus</i> No.2 | 1021                                 | 56                                  | 94.5%          |
| <i>S. aureus</i> No.3 | 820                                  | 44                                  | 94.6%          |

**Table S1** The bacterial number before and after treated by AFF.

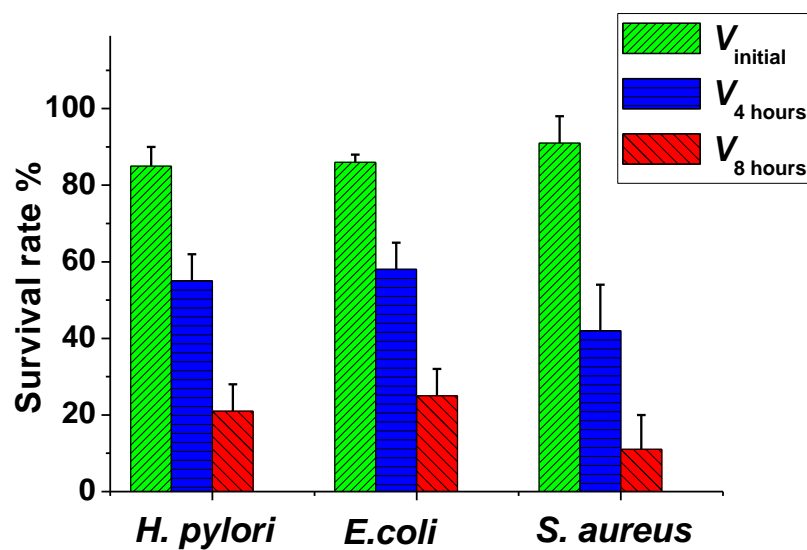

**Figure S3** The survival of bacteria before ( $V_{\text{initial}}$ ) and after trapped by AFF for 4 ( $V_{4 \text{ hours}}$ ) and 8 hours ( $V_{8 \text{ hours}}$ ). The data are the mean of at least three independent experiments  $\pm$  standard deviations.

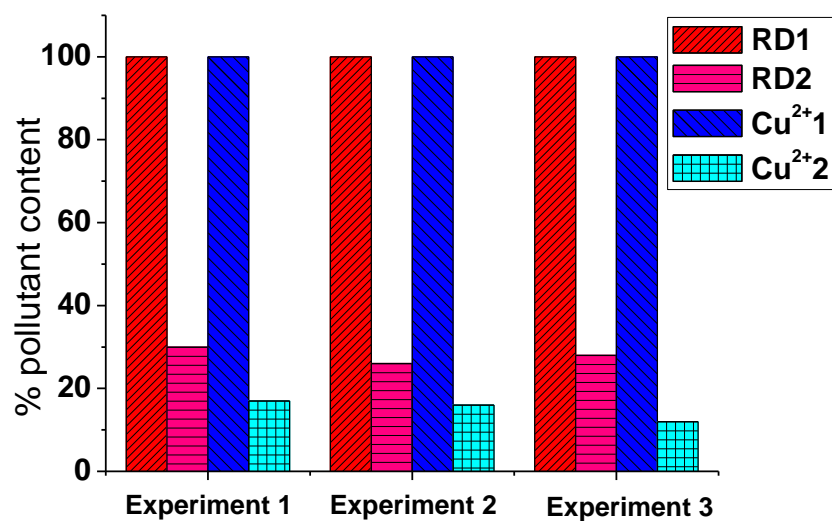

**Figure S4** The contents of Congo red dye (RD2) and CuSO<sub>4</sub> (Cu<sup>2+</sup>2) after treated by AFF for 48 hours. The experiments were repeated for three times. For the ease of comparison, the contents of the Congo red dye (RD1) and CuSO<sub>4</sub> (Cu<sup>2+</sup>1) before treated by AFF was designated as 100% scale.

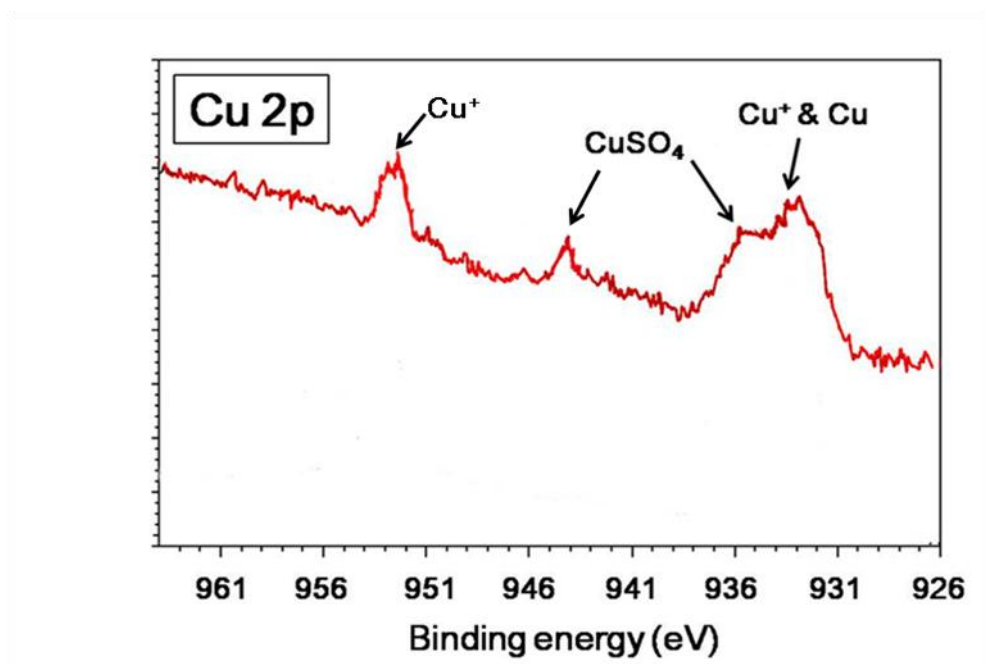

**Figure S5** The XPS study of the AFF after CuSO<sub>4</sub> (Cu<sup>2+</sup>) clearance.

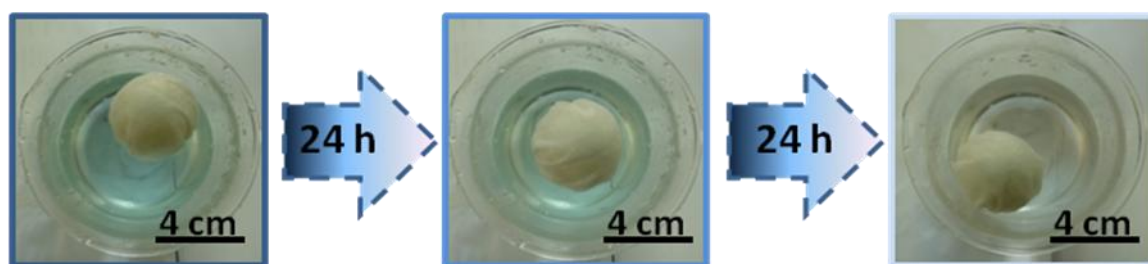

**Figure S6** One practical example of the industrial electroplating waste water treatment by using the packaged AFF.
